# Supplementary material
Source: MDPI journal article supplement (https://www.mdpi.com/2036-7481/15/2/43)
Supplement: s1 [file s1]

**Table S1.** Results of molecular and serological investigation for the presence of *Coxiella burnetii* per cattle farm.

| Farm No | Region                   | Herd Size | Bulk Tank Milk PCR | Bulk Tank Milk ELISA | Sera ELISA positive | Sera ELISA total |
|---------|--------------------------|-----------|--------------------|----------------------|---------------------|------------------|
| 1       | Eastern Macedonia/Thrace | 400       | Negative           | Positive             | 1                   | 9                |
| 2       | Eastern Macedonia/Thrace | 250       | Positive           | Positive             | 2                   | 10               |
| 3       | Eastern Macedonia/Thrace | 200       | Positive           | Positive             | 1                   | 2                |
| 4       | Eastern Macedonia/Thrace | 1000      | Positive           | Positive             | 7                   | 11               |
| 5       | Eastern Macedonia/Thrace | 300       | Positive           | Positive             | NA                  | NA               |
| 6       | Eastern Macedonia/Thrace | 1000      | Positive           | Positive             | 0                   | 8                |
| 7       | Thessaly                 | 150       | Positive           | Positive             | NA                  | NA               |
| 8       | Thessaly                 | 140       | Negative           | Positive             | 0                   | 8                |
| 9       | Central Macedonia        | 110       | Negative           | Positive             | 2                   | 6                |
| 10      | Central Macedonia        | 100       | Positive           | Positive             | 0                   | 6                |
| 11      | Central Macedonia        | 120       | Negative           | Positive             | 2                   | 7                |
| 12      | Central Macedonia        | 400       | Positive           | Positive             | 7                   | 12               |
| 13      | Central Macedonia        | 400       | Positive           | Positive             | 2                   | 6                |
| 14      | Central Macedonia        | 200       | Negative           | Negative             | 1                   | 6                |
| 15      | Epirus                   | 100       | Negative           | Positive             | NA                  | NA               |
| 16      | Epirus                   | 120       | Negative           | Negative             | NA                  | NA               |
| 17      | Epirus                   | 90        | Negative           | Negative             | NA                  | NA               |
| 18      | Epirus                   | 80        | Negative           | Positive             | NA                  | NA               |
| 19      | Epirus                   | 200       | Positive           | Positive             | NA                  | NA               |
| 20      | Epirus                   | 80        | Negative           | Positive             | NA                  | NA               |
| 21      | Epirus                   | 90        | Negative           | Positive             | NA                  | NA               |
| 22      | Central Macedonia        | 300       | Negative           | Positive             | NA                  | NA               |
| 23      | Central Macedonia        | 400       | Negative           | Positive             | NA                  | NA               |
| 24      | Central Macedonia        | 500       | Negative           | Positive             | NA                  | NA               |
| 25      | Central Macedonia        | 550       | Positive           | Positive             | NA                  | NA               |
| 26      | Central Macedonia        | 330       | Negative           | Positive             | NA                  | NA               |
| 27      | Central Macedonia        | 400       | Negative           | Positive             | NA                  | NA               |
| 28      | Central Macedonia        | 500       | Positive           | Positive             | NA                  | NA               |
| 29      | Central Macedonia        | 400       | Positive           | Positive             | NA                  | NA               |
| 30      | Central Macedonia        | 250       | Positive           | Positive             | NA                  | NA               |
| 31      | Eastern Macedonia/Thrace | 400       | Negative           | Positive             | 2                   | 6                |
| 32      | Eastern Macedonia/Thrace | 400       | Positive           | Positive             | 1                   | 7                |
| 33      | Eastern Macedonia/Thrace | 200       | Negative           | Positive             | 5                   | 15               |
| 34      | Eastern Macedonia/Thrace | 700       | Positive           | Positive             | 10                  | 30               |
| 35      | Central Macedonia        | 120       | Positive           | Positive             | 1                   | 6                |
| 36      | Cyclades                 | 200       | Positive           | Positive             | NA                  | NA               |
| 37      | Central Macedonia        | 120       | Positive           | Positive             | 1                   | 6                |
| 38      | Central Greece           | 100       | Positive           | Positive             | 2                   | 6                |
| 39      | Cyclades                 | 100       | Positive           | Positive             | NA                  | NA               |
| 40      | Peloponnese              | 120       | Positive           | Positive             | 9                   | 12               |
| 41      | Central Macedonia        | 200       | Positive           | Positive             | NA                  | NA               |
| 42      | Central Macedonia        | 120       | Positive           | Positive             | 3                   | 6                |
| 43      | Central Macedonia        | 200       | Positive           | Positive             | 5                   | 12               |
| 44      | Thessaly                 | 100       | Negative           | Positive             | NA                  | NA               |
| 45      | Eastern Macedonia/Thrace | 250       | Positive           | Positive             | 6                   | 12               |
| 46      | Central Macedonia        | 200       | Positive           | Positive             | 4                   | 12               |
| 47      | Central Macedonia        | 120       | Positive           | Positive             | 4                   | 6                |
| 48      | Cyclades                 | 100       | Positive           | Positive             | 2                   | 6                |
| 49      | Cyclades                 | 200       | Negative           | Positive             | NA                  | NA               |
| 50      | Cyclades                 | 200       | Positive           | Positive             | NA                  | NA               |
| 51      | Cyclades                 | 200       | Negative           | Positive             | NA                  | NA               |
| 52      | Cyclades                 | 200       | Negative           | Positive             | NA                  | NA               |
| 53      | Cyclades                 | 200       | Positive           | Positive             | NA                  | NA               |
| 54      | Cyclades                 | 200       | Negative           | Positive             | NA                  | NA               |
| 55      | Central Macedonia        | 150       | Negative           | Positive             | NA                  | NA               |
| 56      | Central Macedonia        | 200       | Positive           | Positive             | NA                  | NA               |
| 57      | Western Macedonia        | 200       | Positive           | Positive             | NA                  | NA               |
| 58      | Central Macedonia        | 120       | Positive           | Positive             | 8                   | 12               |
| 59      | Thessaly                 | 200       | Negative           | Positive             | NA                  | NA               |
| 60      | Central Macedonia        | 250       | Positive           | Positive             | 9                   | 12               |
